# Supplementary material
Source: HighWire-hosted journal article supplement (https://gut.bmj.com/content/69/10/1769)
Supplement: inline-supplementary-material-1 [file inline-supplementary-material-1.pdf]

**Supplementary Table 1: RAND Panel members**

| RAND Panellists            | Affiliation                                                            |
|----------------------------|------------------------------------------------------------------------|
| <b>Shahida Din*</b>        | Western General Hospital, Edinburgh                                    |
| <b>Alex Kent</b>           | King's College Hospital NHS Foundation Trust, London                   |
| <b>Richard Pollok*</b>     | St George's University Hospitals NHS Foundation Trust, London          |
| <b>Nick Kennedy^</b>       | Royal Devon and Exeter NHS Foundation Trust, Exeter                    |
| <b>Robin Dart</b>          | Royal Free London NHS Foundation Trust, London                         |
| <b>Daniel Gaya*</b>        | Glasgow Royal Infirmary, NHS Greater Glasgow and Clyde                 |
| <b>Ailsa Hart^</b>         | St Mark's Hospital North West University Healthcare NHS Trust, London  |
| <b>Chris Lamb*</b>         | Newcastle upon Tyne Hospitals NHS Foundation Trust                     |
| <b>Jimmy Limdi</b>         | The Pennine Acute Hospitals NHS Trust, Manchester                      |
| <b>James Lindsay^</b>      | The Royal London Hospital, Barts Health NHS Trust, London              |
| <b>Chris Probert</b>       | University of Liverpool                                                |
| <b>Tim Raine^</b>          | Cambridge University Hospitals NHS Foundation Trust                    |
| <b>Christian Selinger*</b> | Leeds Teaching Hospitals NHS Trust                                     |
| <b>Shaji Sebastian*^</b>   | Hull University Teaching Hospitals NHS Trust                           |
| <b>Lisa Younge</b>         | St Mark's Hospital, North West University Healthcare NHS Trust, London |

\*Denotes British Society of Gastroenterology Inflammatory Bowel Disease Section Committee member

^Denotes British Society of Gastroenterology Inflammatory Bowel Disease Clinical Research Group member
