# Supplementary material
Source: HighWire-hosted journal article supplement (https://gut.bmj.com/content/69/10/1769)
Supplement: inline-supplementary-material-2 [file inline-supplementary-material-2.pdf]

**Supplementary Table 2.** Final Assessment of Statements by RAND Panel: Appropriateness of management in acute severe ulcerative colitis (ASUC) in the context of COVID19

| 91 Statements                                                                                                                                                                                                      | Median | Disagreement Index | Standard Deviation | Category      |
|--------------------------------------------------------------------------------------------------------------------------------------------------------------------------------------------------------------------|--------|--------------------|--------------------|---------------|
| <b>Admission</b>                                                                                                                                                                                                   |        |                    |                    |               |
| <b>All patients admitted with ASUC</b>                                                                                                                                                                             |        |                    |                    |               |
| Perform a SARS-CoV-2 swab on admission                                                                                                                                                                             | 8      | 0.13*              | 0.51               | Appropriate   |
| Perform a CT chest within 24 hours of admission                                                                                                                                                                    | 4      | 0.52               | 1.39               | Uncertain     |
| Perform a CT abdomen, in addition to AXR, within 24 hours of admission                                                                                                                                             | 3      | 0.45               | 2.09               | Inappropriate |
| Isolate them in a side room throughout their admission regardless of COVID status                                                                                                                                  | 8      | 0.23               | 1.21               | Appropriate   |
| <b>Perform a flexible sigmoidoscopy</b>                                                                                                                                                                            |        |                    |                    |               |
| Within 24 hours of admission in all patients admitted with ASUC (as per BSG guidance)                                                                                                                              | 8      | 0.00               | 1.96               | Appropriate   |
| In all patients failing IV corticosteroids who have not had a flexible sigmoidoscopy on admission                                                                                                                  | 9      | 0.13*              | 0.64               | Appropriate   |
| In all patients failing intravenous corticosteroid therapy who have already had a flexible sigmoidoscopy on admission                                                                                              | 3      | 0.00               | 0.88               | Inappropriate |
| In all patients being referred for colectomy who have not had a flexible sigmoidoscopy on admission, to confirm the diagnosis prior to surgery (excluding patients who have toxic megacolon or perforation)        | 8      | 0.23*              | 0.85               | Appropriate   |
| In all patients being referred for colectomy who have already had a flexible sigmoidoscopy on admission, to assess the degree of ongoing inflammation (excluding patients who have toxic megacolon or perforation) | 2      | 0.16               | 0.94               | Inappropriate |
| <b>First line medical therapy</b>                                                                                                                                                                                  |        |                    |                    |               |
| <b>Negative swab and no respiratory symptoms</b>                                                                                                                                                                   |        |                    |                    |               |
| Follow standard BSG guidelines and start intravenous hydrocortisone/methylprednisolone                                                                                                                             | 9      | 0.10               | 0.92               | Appropriate   |

|                                                                                                                                                             |   |       |      |               |
|-------------------------------------------------------------------------------------------------------------------------------------------------------------|---|-------|------|---------------|
| Start IV methylprednisolone 60 mg daily as an outpatient (with daily specialist review, once daily observations and access to x-ray and bloods as required) | 3 | 0.30  | 2.18 | Inappropriate |
| Start budesonide MMX 9 mg or beclometasone 5 mg daily PO (as an inpatient)                                                                                  | 1 | 0.13* | 0.74 | Inappropriate |
| Start IV steroids concurrently with infliximab                                                                                                              | 3 | 0.13  | 2.06 | Inappropriate |
| Start infliximab without steroids                                                                                                                           | 3 | 0.33  | 1.83 | Inappropriate |
| Start ciclosporin monotherapy as a bridge to another therapy                                                                                                | 2 | 0.16  | 1.41 | Inappropriate |
| Start tofacitinib 10 mg bd                                                                                                                                  | 2 | 0.13  | 1.64 | Inappropriate |
| Colectomy                                                                                                                                                   | 1 | 0.10* | 0.74 | Inappropriate |
| Discuss with COVID-19 specialist                                                                                                                            | 3 | 0.16  | 0.92 | Inappropriate |
| <b>Positive swab but no symptoms or signs of COVID-19 pneumonia</b>                                                                                         |   |       |      |               |
| Follow standard BSG guidelines and start intravenous hydrocortisone/methylprednisolone                                                                      | 7 | 0.13  | 0.80 | Appropriate   |
| Start IV methylprednisolone 60 mg daily as an outpatient (with daily specialist review, once daily observations and access to x-ray and bloods as required) | 2 | 0.29  | 2.13 | Inappropriate |
| Start budesonide MMX 9 mg or beclometasone 5 mg daily PO (as an inpatient)                                                                                  | 1 | 0.10* | 0.63 | Inappropriate |
| Start IV steroids concurrently with infliximab                                                                                                              | 2 | 0.16  | 1.58 | Inappropriate |
| Start infliximab without steroids                                                                                                                           | 4 | 0.52  | 1.94 | Uncertain     |
| Start ciclosporin monotherapy as a bridge to another therapy                                                                                                | 2 | 0.16  | 1.36 | Inappropriate |
| Start tofacitinib 10 mg bd                                                                                                                                  | 1 | 0.13  | 1.10 | Inappropriate |
| Colectomy                                                                                                                                                   | 1 | 0.13* | 0.64 | Inappropriate |
| Discuss with COVID-19 specialist                                                                                                                            | 7 | 0.13  | 1.41 | Appropriate   |
| <b>Positive swab with symptoms or signs of COVID-19 pneumonia</b>                                                                                           |   |       |      |               |
| Follow standard BSG guidelines and start intravenous hydrocortisone/methylprednisolone                                                                      | 6 | 0.45  | 1.42 | Uncertain     |
| Start IV methylprednisolone 60 mg daily as an outpatient (with daily specialist review, once daily observations and access to x-ray and bloods as required) | 1 | 0.00* | 0.72 | Inappropriate |

|                                                                                   |   |       |      |               |
|-----------------------------------------------------------------------------------|---|-------|------|---------------|
| Start budesonide MMX 9 mg or beclometasone 5 mg daily PO (as an inpatient)        | 1 | 0.00  | 2.07 | Inappropriate |
| Start IV steroids concurrently with infliximab                                    | 2 | 0.29  | 1.98 | Inappropriate |
| Start infliximab without steroids                                                 | 5 | 0.49  | 1.95 | Uncertain     |
| Start ciclosporin monotherapy as a bridge to another therapy                      | 1 | 0.13  | 1.39 | Inappropriate |
| Start tofacitinib 10 mg bd                                                        | 1 | 0.10* | 0.49 | Inappropriate |
| Colectomy                                                                         | 1 | 0.13* | 0.74 | Inappropriate |
| Discuss with COVID-19 specialist                                                  | 9 | 0.00* | 0.59 | Appropriate   |
| <b>Rescue Therapy</b>                                                             |   |       |      |               |
| Repeat a SARS-CoV-2 swab in patients with a negative first swab                   | 7 | 0.22  | 2.03 | Appropriate   |
| <b>Negative swab and no respiratory symptoms</b>                                  |   |       |      |               |
| Continue intravenous steroids alone                                               | 1 | 0.00* | 0.74 | Inappropriate |
| Start infliximab and continue steroids                                            | 8 | 0.23* | 0.85 | Appropriate   |
| Start infliximab and discontinue steroids                                         | 4 | 0.52  | 1.59 | Uncertain     |
| Start intravenous ciclosporin therapy with steroids (unless failed thiopurine)    | 5 | 0.95  | 2.02 | Uncertain     |
| Start intravenous ciclosporin and discontinue steroids (unless failed thiopurine) | 3 | 0.22  | 1.59 | Inappropriate |
| Colectomy                                                                         | 3 | 0.33  | 1.79 | Inappropriate |
| Discuss with COVID-19 specialist                                                  | 5 | 0.95  | 1.85 | Uncertain     |
| <b>Positive swab but no symptoms or signs of COVID-19 pneumonia</b>               |   |       |      |               |
| Continue intravenous steroids alone                                               | 1 | 0.00* | 0.62 | Inappropriate |
| Start infliximab therapy with steroids                                            | 7 | 0.16  | 1.05 | Appropriate   |
| Start infliximab and discontinue steroids                                         | 6 | 0.52  | 1.59 | Uncertain     |
| Start intravenous ciclosporin therapy with steroids (unless failed thiopurine)    | 3 | 0.22  | 1.29 | Inappropriate |
| Start intravenous ciclosporin and discontinue steroids (unless failed thiopurine) | 3 | 0.16  | 1.25 | Inappropriate |
| Colectomy                                                                         | 2 | 0.33  | 1.74 | Inappropriate |
| Discuss with COVID-19 specialist                                                  | 8 | 0.26* | 0.88 | Appropriate   |
| <b>Positive swab with symptoms or signs of COVID-19 pneumonia</b>                 |   |       |      |               |
| Continue intravenous steroids alone                                               | 1 | 0.00  | 0.92 | Inappropriate |
| Start infliximab with steroids                                                    | 7 | 0.17  | 1.06 | Appropriate   |
| Start infliximab and discontinue steroids                                         | 5 | 0.52  | 1.54 | Uncertain     |

|                                                                                                                                                                              |   |       |      |               |
|------------------------------------------------------------------------------------------------------------------------------------------------------------------------------|---|-------|------|---------------|
| Start intravenous ciclosporin therapy with steroids (unless failed thiopurine)                                                                                               | 2 | 0.27  | 1.46 | Inappropriate |
| Start intravenous ciclosporin and discontinue steroids (unless failed thiopurine)                                                                                            | 2 | 0.29  | 2.07 | Inappropriate |
| Colectomy                                                                                                                                                                    | 2 | 0.29  | 1.64 | Inappropriate |
| Discuss with COVID-19 specialist                                                                                                                                             | 9 | 0.10* | 0.74 | Appropriate   |
| <b>Continuing medical therapy</b>                                                                                                                                            |   |       |      |               |
| <b>Negative swab and no respiratory symptoms</b>                                                                                                                             |   |       |      |               |
| Follow standard BSG guidelines for tapering oral steroids over 6-8 weeks                                                                                                     | 8 | 0.16  | 1.06 | Appropriate   |
| Use an accelerated steroid taper over 4-6 weeks                                                                                                                              | 7 | 0.13  | 1.03 | Appropriate   |
| Use an accelerated steroid taper over fewer than 4 weeks                                                                                                                     | 3 | 0.30  | 1.55 | Inappropriate |
| Switch to budesonide MMX 9 mg or beclomethasone 5 mg daily PO                                                                                                                | 3 | 0.16  | 0.83 | Inappropriate |
| Taper steroids and follow standard BSG guidelines initiating thiopurine therapy at or soon after discharge                                                                   | 4 | 0.45  | 1.77 | Uncertain     |
| Taper steroids and initiate anti-TNF therapy at or soon after discharge                                                                                                      | 7 | 0.00  | 0.64 | Appropriate   |
| Taper steroids and initiate ustekinumab at or soon after discharge                                                                                                           | 7 | 0.00  | 1.76 | Appropriate   |
| Taper steroids and initiate vedolizumab at or soon after discharge                                                                                                           | 7 | 0.22  | 1.72 | Appropriate   |
| Taper steroids and initiate tofacitinib at or soon after discharge                                                                                                           | 4 | 0.86  | 1.92 | Uncertain     |
| Continue prophylactic anticoagulation for a period after discharge                                                                                                           | 5 | 0.95  | 1.98 | Uncertain     |
| <b>Positive swab but no symptoms or signs of COVID-19 pneumonia</b>                                                                                                          |   |       |      |               |
| Follow standard BSG guidelines for tapering oral steroids over 6-8 weeks                                                                                                     | 7 | 0.45  | 1.58 | Appropriate   |
| Use an accelerated steroid taper over 4-6 weeks                                                                                                                              | 7 | 0.16  | 0.70 | Appropriate   |
| Use an accelerated steroid taper over fewer than 4 weeks                                                                                                                     | 3 | 0.45  | 1.82 | Inappropriate |
| Switch to budesonide MMX 9 mg or beclomethasone 5 mg daily PO                                                                                                                | 3 | 0.16  | 1.35 | Inappropriate |
| Taper steroids and follow standard BSG guidelines initiating thiopurine therapy at or soon after discharge (but within the period of potential ongoing SARS-CoV-2 infection) | 3 | 0.16  | 1.49 | Inappropriate |

|                                                                                                                                                                              |   |      |      |               |
|------------------------------------------------------------------------------------------------------------------------------------------------------------------------------|---|------|------|---------------|
| Taper steroids and initiate anti-TNF therapy at or soon after discharge (but within the period of potential ongoing SARS-CoV-2 infection)                                    | 7 | 0.22 | 1.21 | Appropriate   |
| Taper steroids and initiate ustekinumab at or soon after discharge (but within the period of potential ongoing SARS-CoV-2 infection)                                         | 6 | 0.52 | 1.71 | Uncertain     |
| Taper steroids and initiate vedolizumab at or soon after discharge (but within the period of potential ongoing SARS-CoV-2 infection)                                         | 6 | 0.52 | 1.73 | Uncertain     |
| Taper steroids and initiate tofacitinib at or soon after discharge (but within the period of potential ongoing SARS-CoV-2 infection)                                         | 3 | 0.00 | 0.83 | Inappropriate |
| Continue prophylactic anticoagulation for a period after discharge                                                                                                           | 7 | 0.00 | 1.31 | Appropriate   |
| <b>Positive swab with symptoms or signs of COVID-19 pneumonia</b>                                                                                                            |   |      |      |               |
| Follow standard BSG guidelines for tapering oral steroids over 6-8 weeks                                                                                                     | 6 | 0.84 | 1.92 | Uncertain     |
| Use an accelerated steroid over 4-6 weeks                                                                                                                                    | 7 | 0.13 | 0.88 | Appropriate   |
| Use an accelerated steroid taper over fewer than 4 weeks                                                                                                                     | 4 | 0.52 | 2.15 | Uncertain     |
| Switch to budesonide MMX 9 mg or beclomethasone 5 mg daily PO                                                                                                                | 2 | 0.27 | 1.55 | Inappropriate |
| Taper steroids and follow standard BSG guidelines initiating thiopurine therapy at or soon after discharge (but within the period of potential ongoing SARS-CoV-2 infection) | 3 | 0.16 | 1.29 | Inappropriate |
| Taper steroids and initiate anti-TNF therapy at or soon after discharge (but within the period of potential ongoing SARS-CoV2 infection)                                     | 6 | 0.45 | 1.56 | Uncertain     |
| Taper steroids and initiate ustekinumab at or soon after discharge (but within the period of potential ongoing SARS-CoV-2 infection)                                         | 6 | 0.49 | 1.94 | Uncertain     |
| Taper steroids and initiate vedolizumab at or soon after discharge (but within the period of potential ongoing SARS-CoV-2 infection)                                         | 5 | 0.52 | 1.68 | Uncertain     |
| Taper steroids and initiate tofacitinib at or soon after discharge (but within the period of potential ongoing SARS-CoV-2 infection)                                         | 3 | 0.27 | 1.30 | Inappropriate |

|                                                                                                                                        |   |       |      |               |
|----------------------------------------------------------------------------------------------------------------------------------------|---|-------|------|---------------|
| infection)                                                                                                                             |   |       |      |               |
| Continue prophylactic anticoagulation for a period after discharge                                                                     | 8 | 0.13* | 0.83 | Appropriate   |
| <b>Surgery</b>                                                                                                                         |   |       |      |               |
| In patients with a SARS-CoV-2 positive swab who have failed medical therapy, surgery should be delayed                                 | 3 | 0.17  | 1.29 | Inappropriate |
| Patients with a negative swab on admission should have a repeat swab                                                                   | 8 | 0.16  | 1.51 | Appropriate   |
| Patients should have a CT chest prior to surgery regardless of swab status, respiratory symptoms examination findings and observations | 8 | 0.16  | 0.92 | Appropriate   |

\* Denotes questions where all panelists voted the same appropriateness category as the final outcome category (i.e. level of appropriateness was agreed unanimously)
